# Supplementary material for: Systems biology approach to identify transcriptome reprogramming and candidate microRNA targets during the progression of polycystic kidney disease
Source: Springer Nature journal article supplement (doi:10.1186/1752-0509-5-56), 2011-04-25

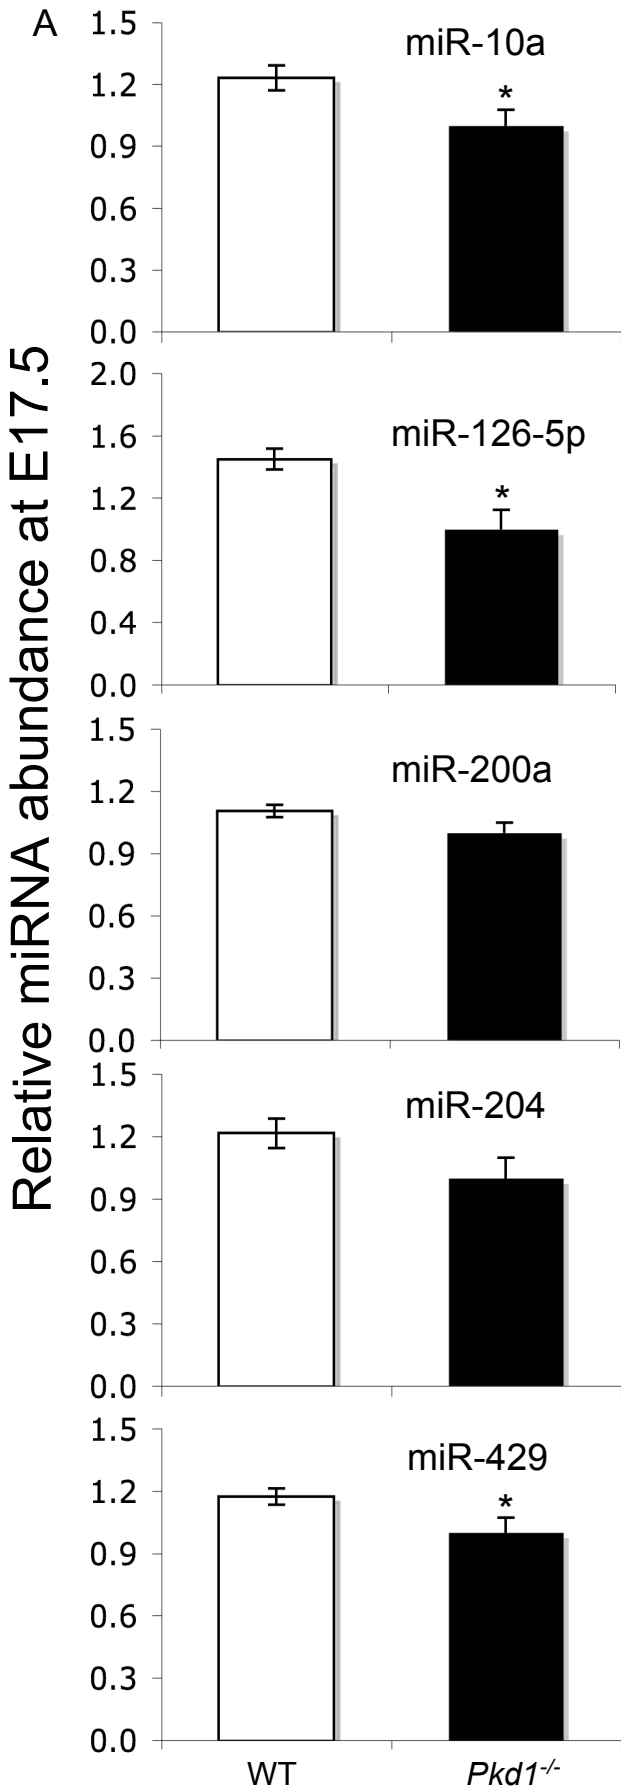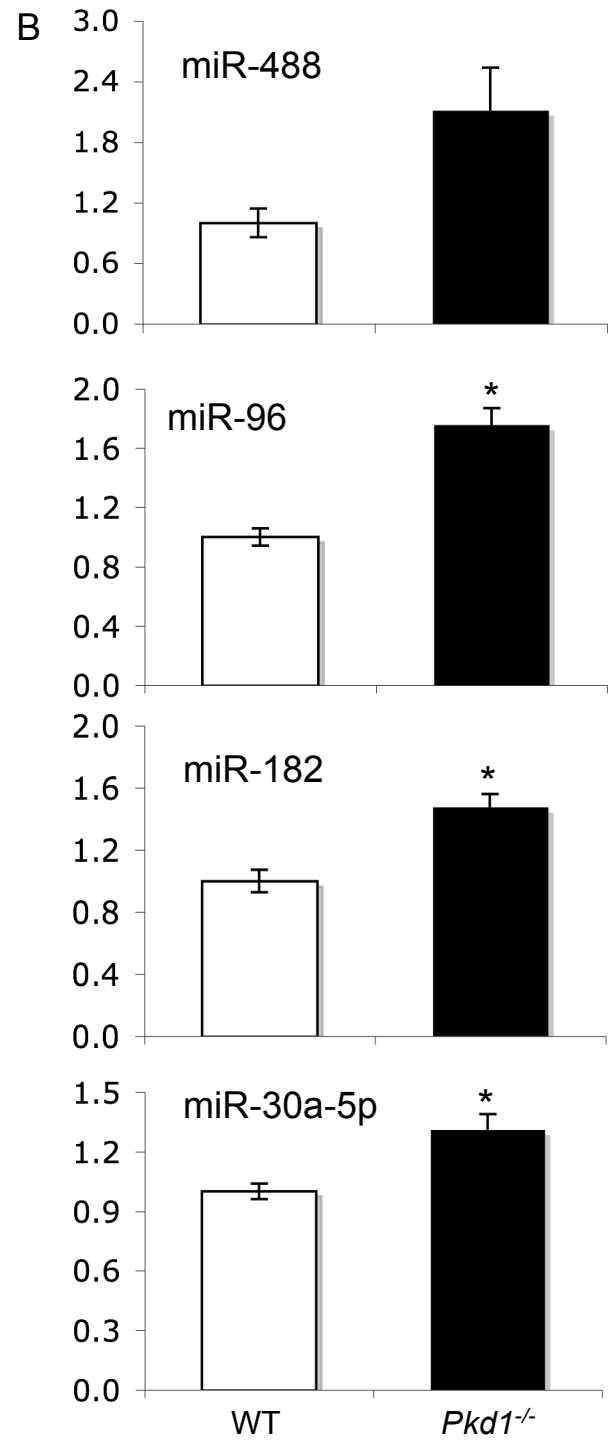

Supplement: 12918_2011_648_MOESM29_ESM.pdf [file 12918_2011_648_MOESM29_ESM.pdf]
